# Supplementary material for: CD44 induced enhancement of phosphatase activity and calcium influx: Modifications of EGR-1 expression and cell proliferation
Source: PubMed Central journal article supplement — Biochem Biophys Rep. 2016 Apr 1;6:172–8. doi: 10.1016/j.bbrep.2016.03.016 (PMC5600419; doi:10.1016/j.bbrep.2016.03.016), 2016-04-01
Supplement: mmc2.pdf [file mmc2.pdf]

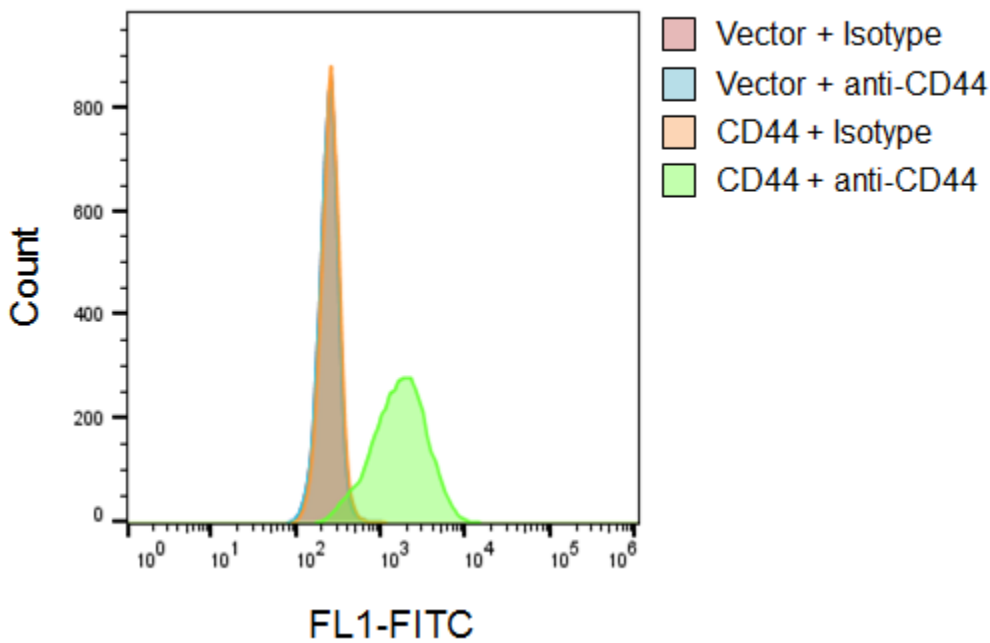

**Supplementary Figure 1. CD44 is expressed by E6.1 Jurkat cells stably transfected with pcDNA/CD44.**

The expression vector engineered to express CD44 was constructed in our laboratory using standard techniques and the nucleotide sequence was confirmed by sequencing. E6.1 Jurkat cells expressed CD44 as assessed by flow cytometry. Importantly, no staining was observed for the antibody isotype control or for incubations of anti-CD44 to the vector control or the vector control plus the isotype control.

Vector

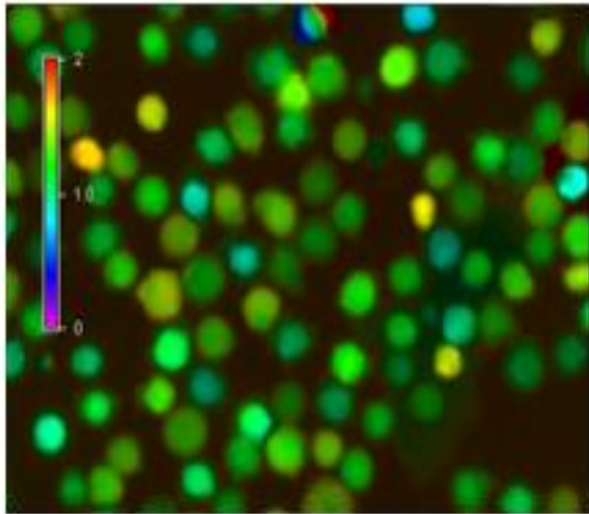

CD44

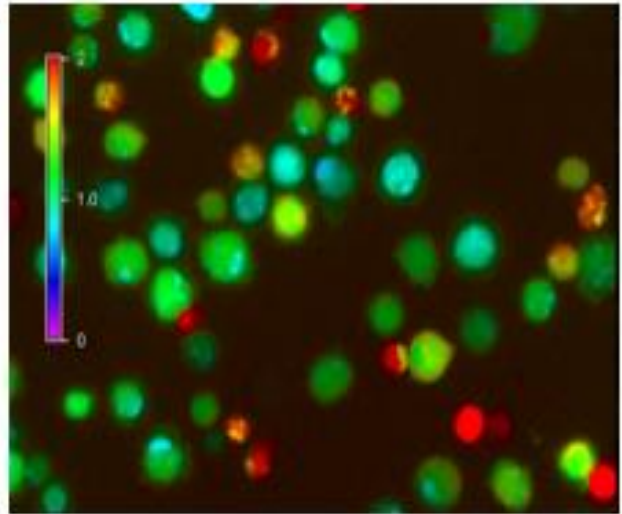

**Supplementary Figure 2. CD44 expressing E6.1 Jurkat cells have higher intracellular  $\text{Ca}^{2+}$  concentrations than vector control E6.1 Jurkat cells.** The image shows a UV microscopic image of the fluorescent ratio (340 nm / 380 nm) of the fura-2-AM loaded cells. The included bar shows the intensity of the ratios.
